# Supplementary material for: From waste to precious: recovering and anchoring Au from electronic wastewater onto poly(m-phenylenediamine) membranes for catalytic nitrophenol conversion
Source: Royal Society of Chemistry journal article supplement (doi:10.1039/d4va00010b), 2024-01-01
Supplement: d4va00010b1.pdf [file d4va00010b1.pdf]

Supplementary Information for

**From Waste to Precious: Recovering and Anchoring Au  
from Electronic Wastewater onto Poly m-Phenylenediamine  
Membrane for Catalytic Nitrophenol Conversion**

Youmei Xu<sup>§a</sup>, Yuchao Chen<sup>§a</sup>, Mengxia Wang<sup>a, b</sup>, Yufei Shu<sup>a</sup>, Siyu Cao<sup>a</sup>, Zhongying Wang<sup>a, c, \*</sup>

<sup>a</sup> School of Environmental Science and Engineering, Southern University of Science and Technology, Shenzhen 518055, China

<sup>b</sup> School of Environment, Harbin Institute of Technology, Harbin 150001, China

<sup>c</sup> Guangdong Provincial Key Laboratory of Soil and Groundwater Pollution Control, Southern University of Science and Technology, Shenzhen 518055, China

§ The authors contributed equally to the work.

\* To whom correspondence should be addressed. E-mail: wangzy6@sustech.edu.cn

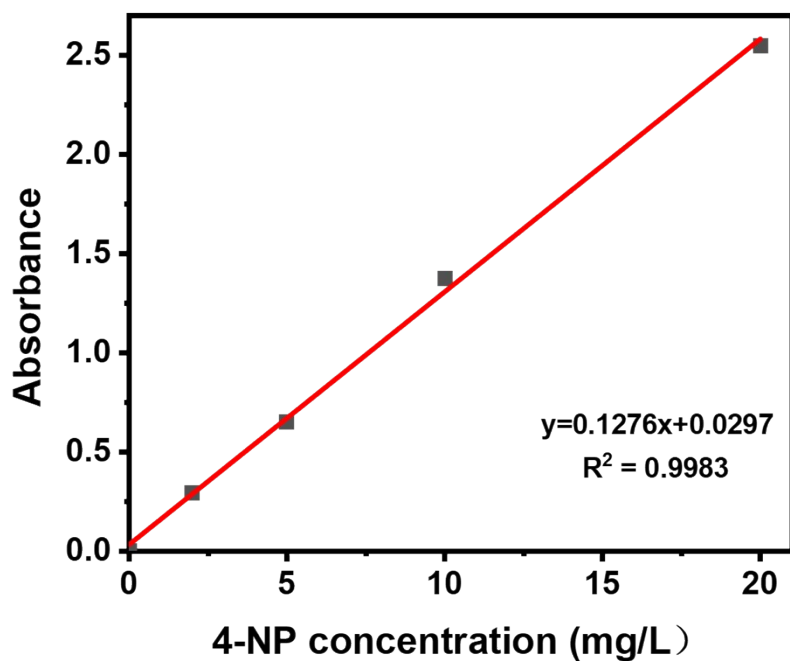

FIGURE S1 Concentration-absorbance standard curve of 4-NP.

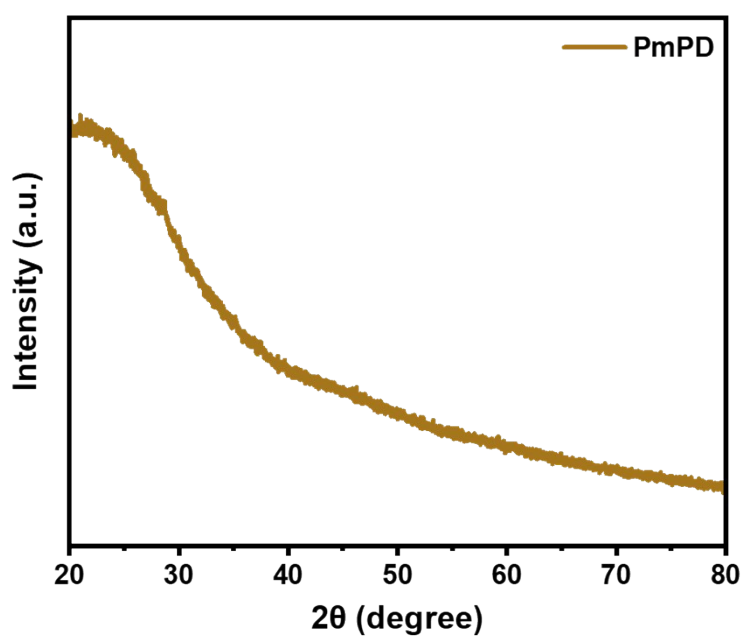

FIGURE S2 XRD pattern of PmPD nanoparticles.

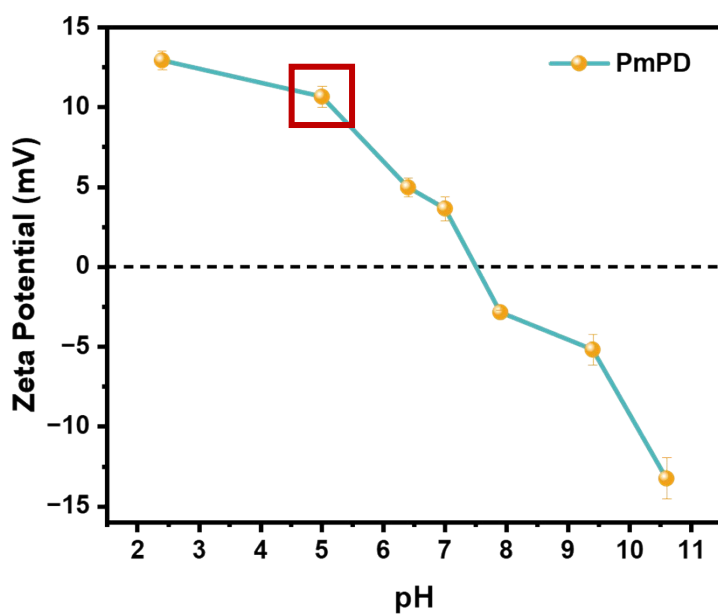

FIGURE S3 Plot of zeta potential versus pH for cross-linked PmPD.

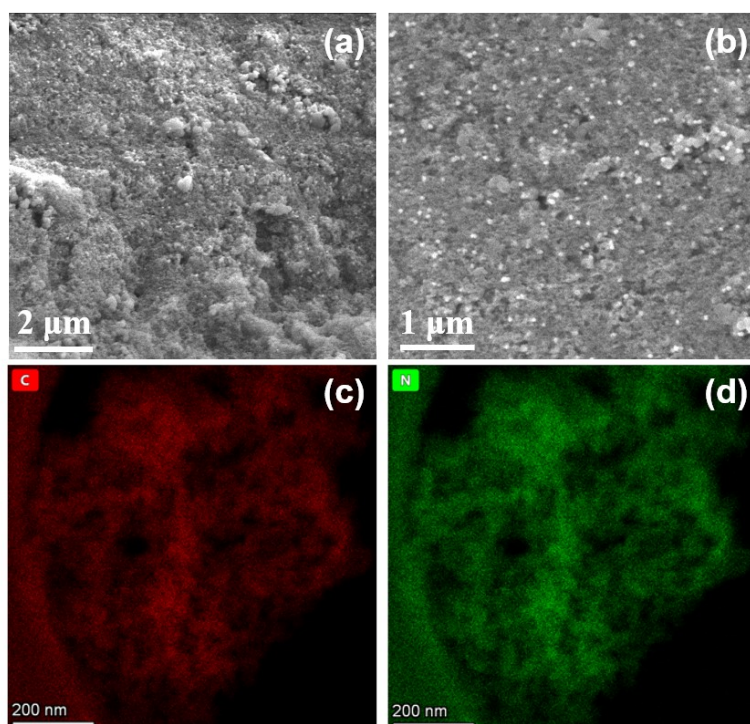

FIGURE S4 (a, b) SEM images, (c) C, (d) N elemental mapping of Au@PmPD membrane.

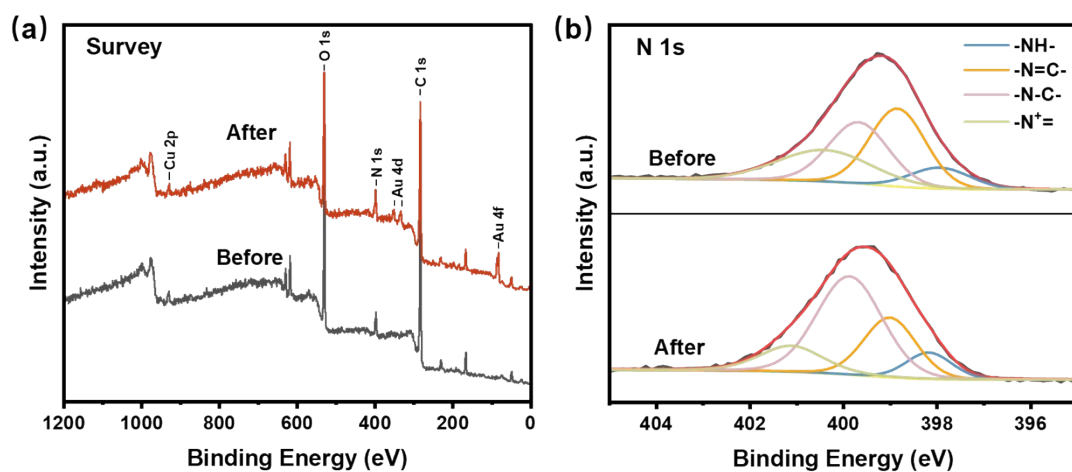

FIGURE S5 The (a) survey and (b) high-resolution N 1s XPS spectra of PmPD membrane before and after Au(III) recovery.

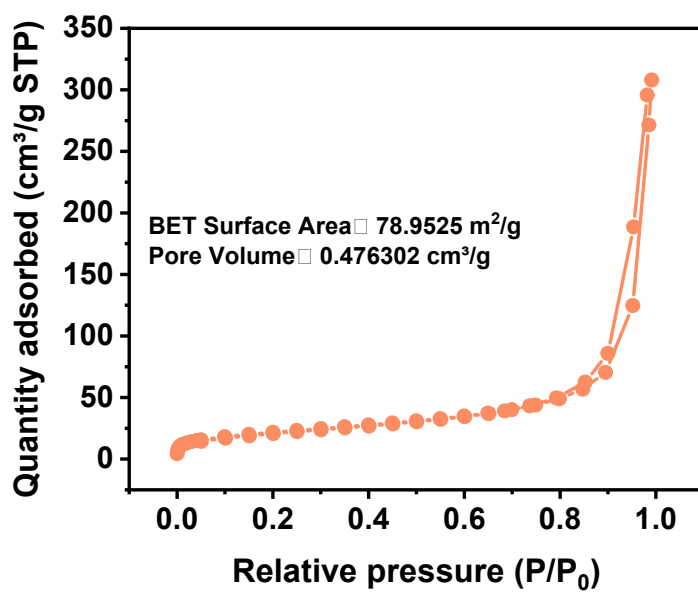

FIGURE S6 N<sub>2</sub> adsorption-desorption isotherm of Au@PmPD.

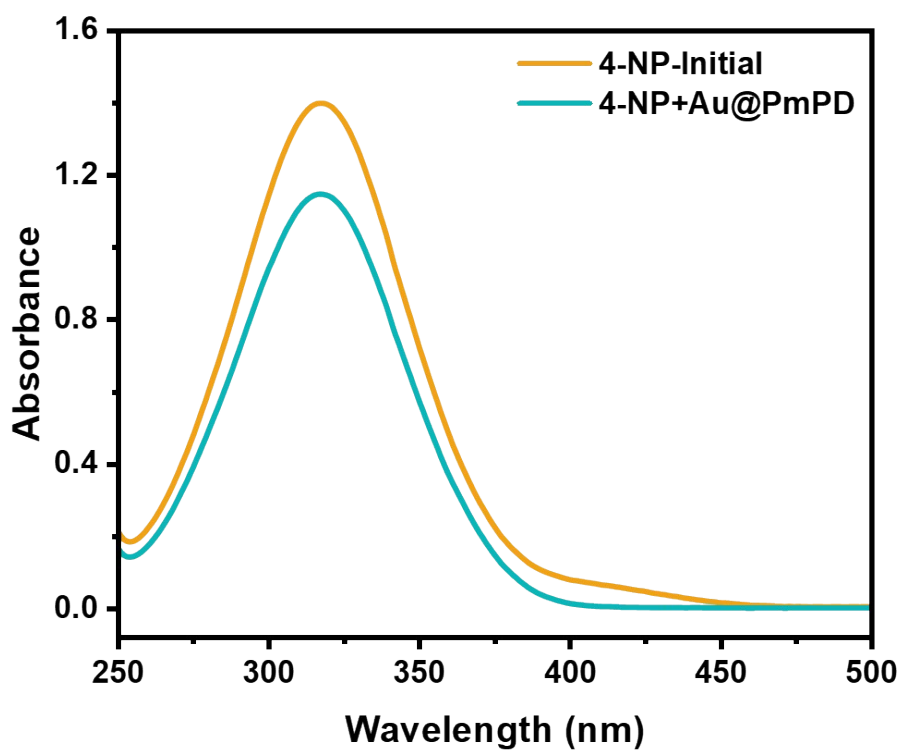

FIGURE S7 UV-vis absorbance changes of 4-NP before and after passing through Au@PmPD membrane.

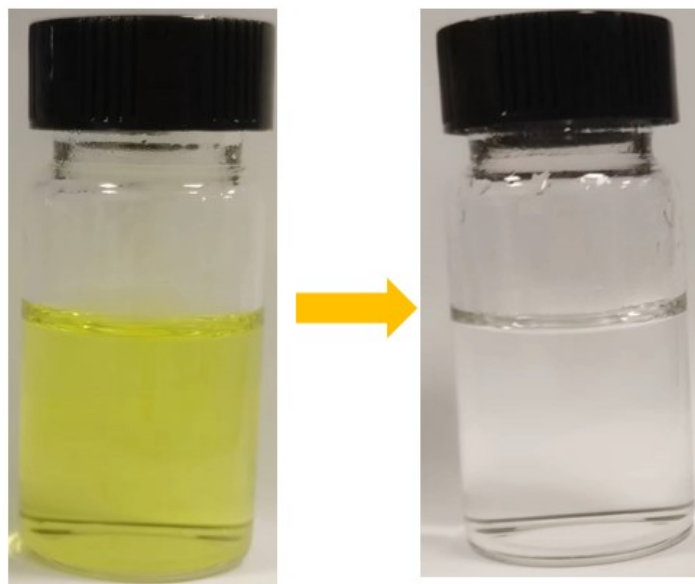

FIGURE S8 Color change of 4-NP solution before and after catalytic reduction reaction through the Au@PmPD membrane.

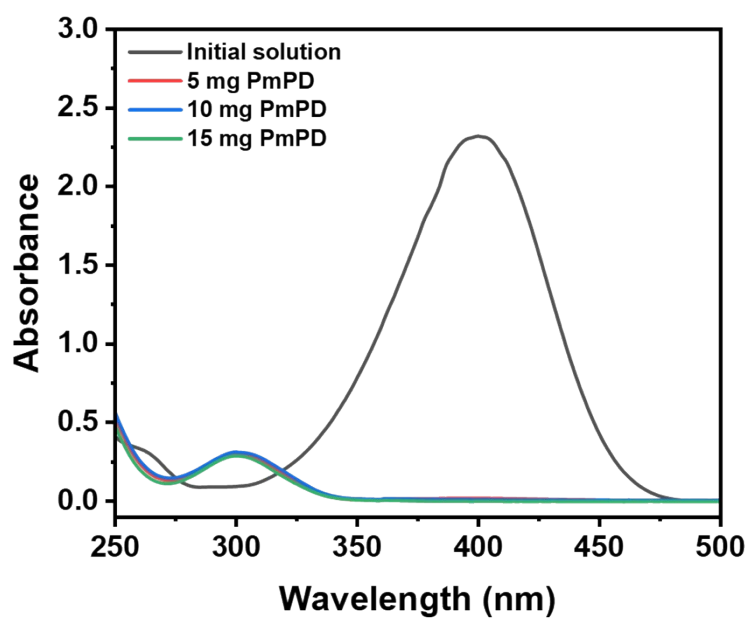

FIGURE S9 The effect of PmPD loading on the catalytic performance of Au@PmPD membrane.

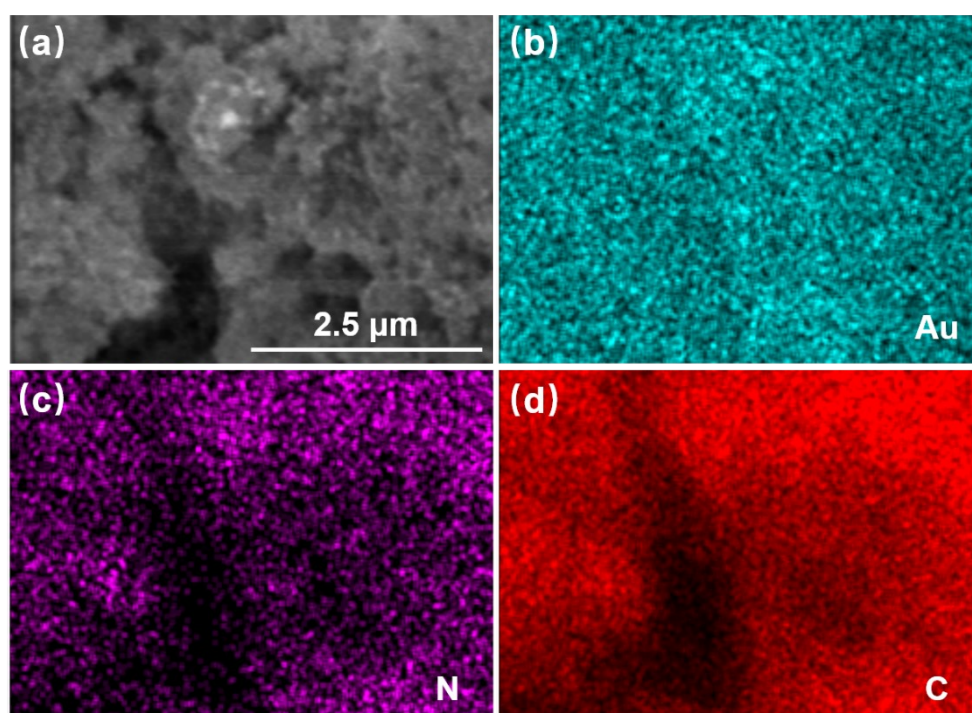

FIGURE S10 (a) SEM image, (b) Au, (c) N, (d) C elemental mapping spectra of the Au@PmPD membrane after 136-min reaction.

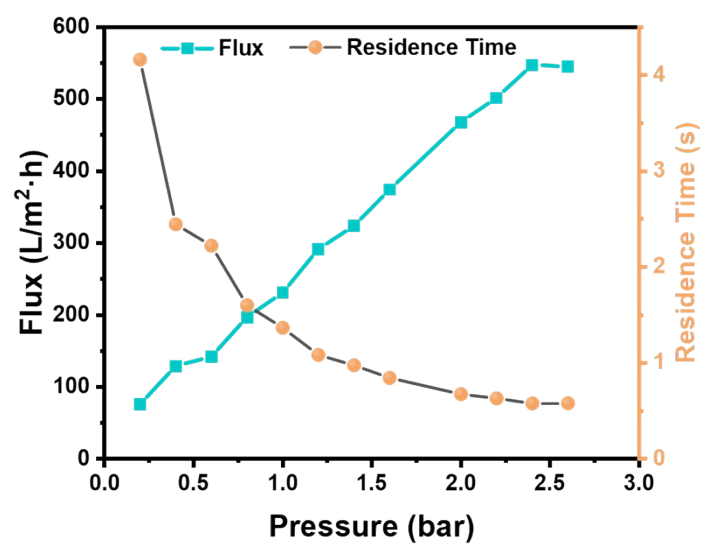

FIGURE S11 Plot of flux and residence time versus pressure for the Au@PmPD membrane.

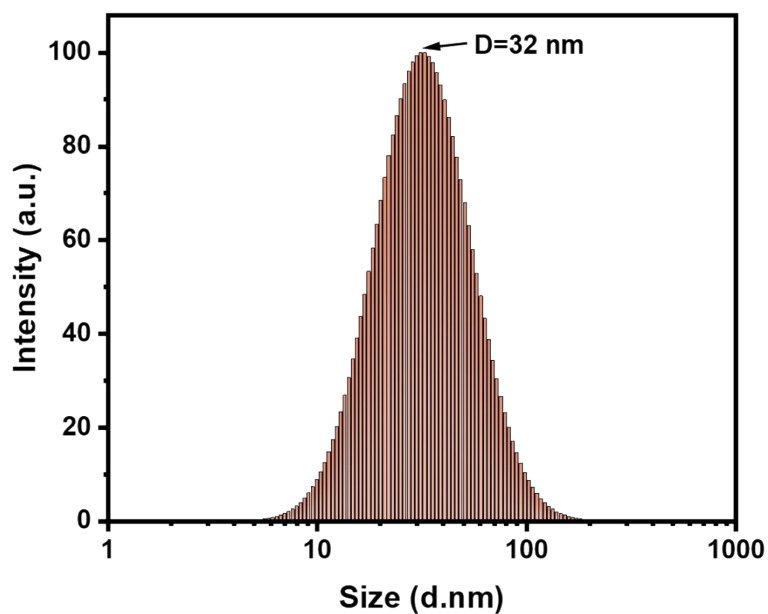

FIGURE S12 Size distribution of Au NPs dispersion.

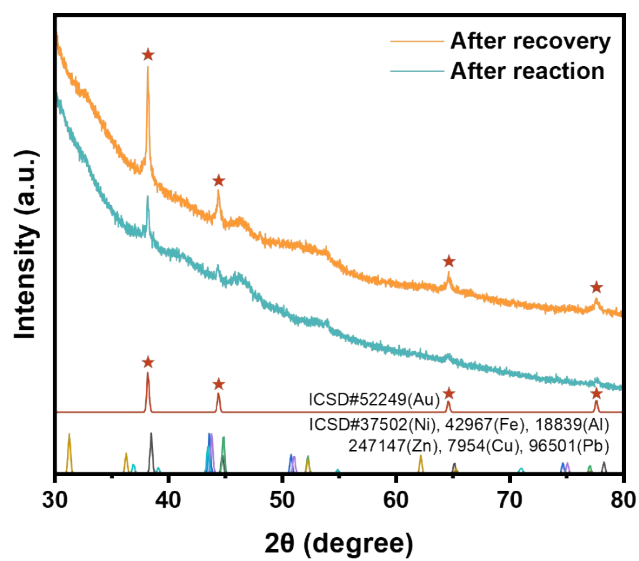

FIGURE S13 XRD patterns of the PmPD membranes after electronic wastewater recovery and the following catalytic reaction.



**Text S1 The measurement of effective pore volume ( $V_{eff}$ ).**

To determine the effective pore volume of the Au@PmPD membrane, a “water-filling” method was employed.<sup>1,2</sup> The experimental procedure involved the following specific steps: Firstly, the mass of the dry nylon membrane substrate was denoted as  $m_0$ . Subsequently, the membrane was immersed in water and weighed as  $m_1$ . Then the masses of Au@PmPD membrane containing 15 mg PmPD and 4.0 mg Au NPs in dry ( $m_2$ ) and wet states ( $m_3$ ) were measured. Finally, the amount of water present in the membrane pores was utilized to calculate the effective pore volume ( $V_{eff}$ ,  $\text{cm}^3$ ) of the Au@PmPD membrane, employing Equation S1:

$$V_{eff} = \frac{(m_3 - m_2) - (m_1 - m_0)}{\rho_{H_2O}} \quad \text{S1}$$

**Table S1 Comparison of catalytic reduction of 4-NP by Au@PmPD membrane with the membranes reported in published literature.**

| Membrane Catalyst                          | 4-NP (mM) | NaBH <sub>4</sub> (mM) | K value (s <sup>-1</sup> ) | conversion | References |
|--------------------------------------------|-----------|------------------------|----------------------------|------------|------------|
| Nanoporous Cu/Cu <sub>2</sub> O            | 0.067     | 34                     | 0.024                      | >95%       | 3          |
| PET-DOPA-PEI-GNP                           | 0.2       | 20                     | 0.0041                     | >99%       | 4          |
| Cu-Ag-Au NPs@β-LGF                         | 0.29      | 300                    | 0.038                      | ~89%       | 5          |
| Pd0 NPs@SPES-C                             | 0.5       | 50                     | 0.0132                     | ~90%       | 6          |
| AgNPs/ESM                                  | 0.29      | 300                    | 0.0042                     | >95%       | 7          |
| AuNCs/CNTs                                 | 0.15      | 28.13                  | 0.033                      | >99%       | 8          |
| HCNM-AuNPs                                 | 0.2       | 50                     | 0.0133                     | >99%       | 9          |
| Ag/TiO <sub>2</sub> /PVDF@TiO <sub>2</sub> | 0.1       | 10                     | 1.47                       | >96%       | 10         |
| Au@PmPD                                    | 0.14      | 25                     | 2.206                      | >99%       | This work  |

**Table S2 Characteristics of simulated electronic wastewater.**

|                         |                  |        |
|-------------------------|------------------|--------|
|                         | pH               | -0.92  |
| c/(mg·L <sup>-1</sup> ) | Cu <sup>2+</sup> | 15700  |
|                         | Fe <sup>3+</sup> | 4440.5 |
|                         | Zn <sup>2+</sup> | 2010   |
|                         | Al <sup>3+</sup> | 1985   |
|                         | Ni <sup>2+</sup> | 675.5  |
|                         | Pb <sup>2+</sup> | 19.54  |
|                         | Au <sup>3+</sup> | 5.55   |

**Table S3 Quality characteristics of simulated dyeing wastewater.**

|                                                   |                      |      |
|---------------------------------------------------|----------------------|------|
| c/(mg·L <sup>-1</sup> )                           | methylene blue (MB)  | 100  |
|                                                   | 4-nitrophenol (4-NP) | 20   |
|                                                   | NaCl                 | 1000 |
| pH                                                |                      | 10.2 |
| Conductivity/( $\mu\text{S}\cdot\text{cm}^{-1}$ ) |                      | 2074 |

## References:

1. Zhang, S.; Sun, M.; Hedtke, T.; Deshmukh, A.; Zhou, X.; Weon, S.; Elimelech, M.; Kim, J. Mechanism of Heterogeneous Fenton Reaction Kinetics Enhancement under Nanoscale Spatial Confinement. *Environ. Sci. Technol.* **2020**, *54*(17), 10868-10875.
2. Zhang, S.; Hedtke, T.; Zhu, Q.; Sun, M.; Weon, S.; Zhao, Y.; Stavitski, E.; Elimelech, M.; Kim, J. Membrane-Confined Iron Oxychloride Nanocatalysts for Highly Efficient Heterogeneous Fenton Water Treatment. *Environ. Sci. Technol.* **2021**, *55*(13), 9266-9275.
3. Bai, X.; Chen, D.; Li, Y.; Yang, X.; Zhang, M.; Wang, T.; Zhang, X.; Zhang, L.; Fu, Y.; Qi, X.; Qi, W. Two-dimensional MOF-derived nanoporous Cu/Cu<sub>2</sub>O networks as catalytic membrane reactor for the continuous reduction of p-nitrophenol. *J. Membrane Sci.* **2019**, *582*, 30-36.
4. Subair, R.; Tripathi, B.P.; Formanek, P.; Simon, F.; Uhlmann, P.; Stamm, M. Polydopamine modified membranes with in situ synthesized gold nanoparticles for catalytic and environmental applications. *Chem. Eng. J.* **2016**, *295*, 358-369.
5. Huang, R.; Zhu, H.; Su, R.; Qi, W.; He, Z. Catalytic Membrane Reactor Immobilized with Alloy Nanoparticle-Loaded Protein Fibrils for Continuous Reduction of 4-Nitrophenol. *Environ. Sci. Technol.* **2016**, *50*(20), 11263-11273.
6. Domènech, B.; Muñoz, M.; Muraviev, D.N.; Macanás, J. Catalytic membranes with palladium nanoparticles: From tailored polymer to catalytic applications. *Catal. Today.* **2012**, *193*(1), 158-164.
7. Liang, M.; Su, R.; Qi, W.; Yu, Y.; Wang, L.; He, Z. Synthesis of well-dispersed Ag nanoparticles on eggshell membrane for catalytic reduction of 4-nitrophenol. *J. Mater. Sci.* **2014**, *49*(4), 1639-1647.
8. Liu, Y.; Zheng, Y.; Du, B.; Nasaruddin, R.R.; Chen, T.; Xie, J. Golden Carbon Nanotube Membrane for Continuous Flow Catalysis. *Ind. Eng. Chem. Res.* **2017**, *56*(11), 2999-3007.
9. Wang, H.; Dong, Z.; Na, C. Hierarchical Carbon Nanotube Membrane-Supported Gold Nanoparticles for Rapid Catalytic Reduction of p-Nitrophenol. *ACS Sustain. Chem. Eng.* **2013**, *1*(7), 746-752.
10. Wang, Y.; Ma, S.; Huang, M.; Yang, H.; Xu, Z.; Xu, Z. Ag NPs coated PVDF@TiO<sub>2</sub> nanofiber membrane prepared by epitaxial growth on TiO<sub>2</sub> inter-layer for 4-NP reduction application. *Sep. Purif. Technol.* **2019**, *227*, 115700.
